# Supplementary material for: Host Cell Response to Rotavirus Infection with Emphasis on Virus–Glycan Interactions, Cholesterol Metabolism, and Innate Immunity
Source: MDPI journal article supplement (doi:10.3390/v15071406), 2023-06-21
Supplement: s1 [file s1]

### Supplementary Materials:

**Supplementary Table S1.** Summary of DEGs affected by both G9P[13] and G5P[7] strains. Genes are shown with '↓' and '↑' referring to down or upregulation, respectively. These are also depicted with red arrows signifying upregulation, and blue representing down regulation. Differentially expressed genes are bolded. The upregulated/downregulated genes were determined using a cut off  $\pm \geq 2$  or  $\leq 2$  when respectively compared with the control group (non-treated). All genes listed account for active protein coding.

| Gene Symbol       | Description                                                         | G5P[7] | G9P[13] |
|-------------------|---------------------------------------------------------------------|--------|---------|
| <b>ABCG2</b>      | ATP-binding cassette, sub-family G (WHITE), member 2                | ↓      | ↑       |
| <b>ABCG5</b>      | ATP binding cassette subfamily G member 5, transcript variant X1    | ↓      | ↑       |
| <b>ABCG8</b>      | ATP binding cassette subfamily G member 8, transcript variant X1    | ↓      | ↑       |
| <b>ANPEP</b>      | alanyl aminopeptidase, membrane                                     | ↓      | ↑       |
| <b>AOC1</b>       | amine oxidase, copper containing 1, transcript variant X5           | ↓      | ↑       |
| <b>BATF3</b>      | basic leucine zipper ATF-like transcription factor 3                | ↓      | ↓       |
| <b>C1H9orf16</b>  | chromosome 1 C9orf16 homolog                                        | ↑      | ↑       |
| <b>C6H19orf81</b> | chromosome 6 C19orf81 homolog, transcript variant X1                | ↑      | ↑       |
| <b>C8H4orf48</b>  | chromosome 8 C4orf48 homolog                                        | ↑      | ↑       |
| <b>CATSPER4</b>   | cation channel sperm associated 4                                   | ↓      | ↑       |
| <b>CDK5R1</b>     | cyclin dependent kinase 5 regulatory subunit 1                      | ↓      | ↓       |
| <b>CFAP61</b>     | cilia and flagella associated protein 61, transcript variant X3     | ↓      | ↓       |
| <b>CLIC5</b>      | chloride intracellular channel 5                                    | ↓      | ↑       |
| <b>CMC4</b>       | C-X9-C motif containing 4, transcript variant X1                    | ↑      | ↑       |
| <b>CNTNAP2</b>    | contactin associated protein-like 2                                 | ↓      | ↑       |
| <b>CORO2B</b>     | coronin 2B, transcript variant X2                                   | ↓      | ↓       |
| <b>CPA6</b>       | carboxypeptidase A6, transcript variant X1                          | ↓      | ↓       |
| <b>CRTAC1</b>     | cartilage acidic protein 1, transcript variant X2                   | ↑      | ↑       |
| <b>CSDC2</b>      | cold shock domain containing C2                                     | ↓      | ↑       |
| <b>CYP26A1</b>    | cytochrome P450, family 26, subfamily A, polypeptide 1              | ↓      | ↓       |
| <b>CYS1</b>       | cystin 1                                                            | ↑      | ↑       |
| <b>DCST1</b>      | DC-STAMP domain containing 1                                        | ↓      | ↑       |
| <b>DENND1C</b>    | DENN domain containing 1C                                           | ↓      | ↓       |
| <b>DENND2A</b>    | DENN domain containing 2A, transcript variant X5                    | ↓      | ↓       |
| <b>DPCR1</b>      | diffuse panbronchiolitis critical region 1                          | ↓      | ↑       |
| <b>EGR2</b>       | early growth response 2                                             | ↓      | ↓       |
| <b>ELMOD1</b>     | ELMO domain containing 1, transcript variant X4                     | ↓      | ↓       |
| <b>ENKD1</b>      | enkurin domain containing 1, transcript variant X1                  | ↑      | ↑       |
| <b>FAM129C</b>    | family with sequence similarity 129 member C                        | ↑      | ↑       |
| <b>FAM25A</b>     | family with sequence similarity 25 member A                         | ↑      | ↑       |
| <b>FAM71E1</b>    | family with sequence similarity 71 member E1, transcript variant X2 | ↑      | ↑       |
| <b>FAR2</b>       | fatty acyl-CoA reductase 2, transcript variant X1                   | ↓      | ↑       |
| <b>FGF22</b>      | fibroblast growth factor 22                                         | ↑      | ↑       |
| <b>FOSB</b>       | FosB proto-oncogene, AP-1 transcription factor subunit              | ↑      | ↑       |
| <b>FOXH1</b>      | forkhead box H1, transcript variant X3                              | ↑      | ↑       |
| <b>GAREM2</b>     | GRB2 associated regulator of MAPK1 subtype 2, transcript variant X2 | ↓      | ↓       |
| <b>GGN</b>        | gametogenetin                                                       | ↑      | ↑       |

|                |                                                                                                        |   |   |
|----------------|--------------------------------------------------------------------------------------------------------|---|---|
| <b>GGT5</b>    | gamma-glutamyltransferase 5, transcript variant X2                                                     | ↑ | ↑ |
| <b>GPAT2</b>   | glycerol-3-phosphate acyltransferase 2, mitochondrial, transcript variant X3                           | ↑ | ↑ |
| <b>GPR156</b>  | G protein-coupled receptor 156, transcript variant X6                                                  | ↓ | ↓ |
| <b>HDAC9</b>   | histone deacetylase 9, transcript variant X22                                                          | ↓ | ↓ |
| <b>HHLA2</b>   | HERV-H LTR-associating 2, transcript variant X22                                                       | ↓ | ↑ |
| <b>HMGCS2</b>  | 3-hydroxy-3-methylglutaryl-CoA synthase 2                                                              | ↓ | ↑ |
| <b>IFIT1</b>   | interferon-induced protein with tetratricopeptide repeats 1                                            | ↓ | ↓ |
| <b>IGFBP3</b>  | insulin like growth factor binding protein 3                                                           | ↓ | ↓ |
| <b>JPH1</b>    | junctophilin 1, transcript variant X1                                                                  | ↓ | ↓ |
| <b>KIF1A</b>   | kinesin family member 1A                                                                               | ↓ | ↑ |
| <b>LEAP2</b>   | liver enriched antimicrobial peptide 2                                                                 | ↑ | ↑ |
| <b>LEKR1</b>   | leucine, glutamate and lysine rich 1, transcript variant X1                                            | ↑ | ↑ |
| <b>LRRC23</b>  | leucine rich repeat containing 23, transcript variant X2                                               | ↑ | ↑ |
| <b>LRRC31</b>  | leucine rich repeat containing 31, transcript variant X2                                               | ↑ | ↑ |
| <b>LTB4R</b>   | leukotriene B4 receptor, transcript variant X1                                                         | ↓ | ↑ |
| <b>LTF</b>     | lactotransferrin                                                                                       | ↓ | ↓ |
| <b>MAF</b>     | MAF bZIP transcription factor, transcript variant X1                                                   | ↓ | ↑ |
| <b>MCAM</b>    | melanoma cell adhesion molecule, transcript variant X3                                                 | ↓ | ↓ |
| <b>MDFI</b>    | MyoD family inhibitor, transcript variant X4                                                           | ↓ | ↓ |
| <b>MIA</b>     | melanoma inhibitory activity, transcript variant X1                                                    | ↓ | ↓ |
| <b>MIR7138</b> | ssc-miR-7138-3p                                                                                        | ↓ | ↓ |
| <b>MOGAT2</b>  | monoacylglycerol O-acyltransferase 2                                                                   | ↓ | ↑ |
| <b>MRC1</b>    | mannose receptor C-type 1                                                                              | ↓ | ↑ |
| <b>MTERF2</b>  | mitochondrial transcription termination factor 2                                                       | ↓ | ↓ |
| <b>MTTP</b>    | microsomal triglyceride transfer protein                                                               | ↓ | ↑ |
| <b>MUC12</b>   | mucin 12, cell surface associated                                                                      | ↓ | ↑ |
| <b>MYH15</b>   | myosin heavy chain 15                                                                                  | ↑ | ↓ |
| <b>NAGS</b>    | N-acetylglutamate synthase                                                                             | ↓ | ↑ |
| <b>NEURL3</b>  | neuralized E3 ubiquitin protein ligase 3                                                               | ↑ | ↑ |
| <b>NKX3-2</b>  | NK3 homeobox 2                                                                                         | ↓ | ↓ |
| <b>OASL</b>    | 2'-5'-oligoadenylate synthetase like                                                                   | ↑ | ↑ |
| <b>ONECUT2</b> | one cut homeobox 2                                                                                     | ↑ | ↑ |
| <b>OVGP1</b>   | oviductal glycoprotein 1                                                                               | ↓ | ↓ |
| <b>PCDH7</b>   | protocadherin 7                                                                                        | ↓ | ↓ |
| <b>PDGFR</b>   | platelet derived growth factor receptor like, transcript variant X1                                    | ↓ | ↓ |
| <b>PECAM1</b>  | platelet and endothelial cell adhesion molecule 1                                                      | ↓ | ↓ |
| <b>PIK3CG</b>  | phosphatidylinositol-4,5-bisphosphate 3-kinase catalytic subunit gamma                                 | ↓ | ↓ |
| <b>PIRT</b>    | phosphoinositide interacting regulator of transient receptor potential channels, transcript variant X2 | ↑ | ↑ |
| <b>PLBD1</b>   | phospholipase B domain containing 1                                                                    | ↓ | ↓ |
| <b>PLPPR2</b>  | phospholipid phosphatase related 2, transcript variant X1                                              | ↑ | ↑ |
| <b>PPP1R36</b> | protein phosphatase 1 regulatory subunit 36, transcript variant X1                                     | ↓ | ↓ |
| <b>RAB39A</b>  | RAB39A, member RAS oncogene family, transcript variant X1                                              | ↓ | ↓ |
| <b>RAB4B</b>   | RAB4B, member RAS oncogene family, transcript variant X1                                               | ↑ | ↑ |
| <b>RET</b>     | ret proto-oncogene                                                                                     | ↓ | ↓ |

|                 |                                                                               |   |   |
|-----------------|-------------------------------------------------------------------------------|---|---|
| <b>RGL1</b>     | ral guanine nucleotide dissociation stimulator like 1, transcript variant X2  | ↓ | ↓ |
| <b>RGS16</b>    | regulator of G protein signaling 16                                           | ↑ | ↑ |
| <b>RLN3</b>     | relaxin 3                                                                     | ↑ | ↑ |
| <b>ROM1</b>     | retinal outer segment membrane protein 1                                      | ↑ | ↑ |
| <b>RSPH1</b>    | radial spoke head 1 homolog, transcript variant X3                            | ↓ | ↓ |
| <b>RSPH9</b>    | radial spoke head 9 homolog, transcript variant X2                            | ↑ | ↑ |
| <b>RTN4RL1</b>  | reticulon 4 receptor like 1, transcript variant X1                            | ↓ | ↓ |
| <b>SCNN1A</b>   | sodium channel epithelial 1 alpha subunit                                     | ↑ | ↑ |
| <b>SECTM1</b>   | secreted and transmembrane 1                                                  | ↑ | ↑ |
| <b>SLA-5</b>    | MHC class I antigen 5                                                         | ↑ | ↑ |
| <b>SLC10A4</b>  | solute carrier family 10 member 4                                             | ↓ | ↓ |
| <b>SLC26A7</b>  | solute carrier family 26 member 7, transcript variant X5                      | ↑ | ↑ |
| <b>SLC30A10</b> | solute carrier family 30 member 10                                            | ↑ | ↑ |
| <b>SLC35G2</b>  | solute carrier family 35 member G2, transcript variant X1                     | ↓ | ↓ |
| <b>SLC51B</b>   | solute carrier family 51 beta subunit, transcript variant X1                  | ↓ | ↑ |
| <b>SLC6A4</b>   | solute carrier family 6 member 4, transcript variant X1                       | ↓ | ↑ |
| <b>SNAI1</b>    | snail family transcriptional repressor 1                                      | ↑ | ↑ |
| <b>SNX22</b>    | sorting nexin 22, transcript variant X2                                       | ↓ | ↓ |
| <b>SPDEF</b>    | SAM pointed domain containing ets transcription factor                        | ↑ | ↑ |
| <b>ST18</b>     | ST18, C2H2C-type zinc finger, transcript variant X18                          | ↓ | ↓ |
| <b>STAG3</b>    | stromal antigen 3, transcript variant X2                                      | ↑ | ↑ |
| <b>STARD7</b>   | StAR related lipid transfer domain containing 7                               | ↓ | ↓ |
| <b>SYBU</b>     | syntabulin                                                                    | ↑ | ↑ |
| <b>SYT12</b>    | synaptotagmin 12, transcript variant X4                                       | ↑ | ↑ |
| <b>TEX14</b>    | testis expressed 14, intercellular bridge forming factor                      | ↓ | ↓ |
| <b>TFF2</b>     | trefoil factor 2                                                              | ↑ | ↑ |
| <b>TGM3</b>     | transglutaminase 3                                                            | ↑ | ↑ |
| <b>TMCO2</b>    | transmembrane and coiled-coil domains 2                                       | ↑ | ↑ |
| <b>TMEM255B</b> | transmembrane protein 255B, transcript variant X2                             | ↑ | ↑ |
| <b>TMEM88B</b>  | transmembrane protein 88B                                                     | ↑ | ↑ |
| <b>TREX2</b>    | three prime repair exonuclease 2, transcript variant X2                       | ↓ | ↑ |
| <b>TRIM31</b>   | tripartite motif containing 31                                                | ↓ | ↑ |
| <b>TUBAL3</b>   | tubulin alpha like 3                                                          | ↓ | ↑ |
| <b>WFIKKN1</b>  | WAP, follistatin/kazal, immunoglobulin, kunitz and netrin domain containing 1 | ↑ | ↑ |
